# Supplementary material for: A comparison of explainable artificial intelligence methods in the phase classification of multi-principal element alloys
Source: PubMed Central journal article supplement (PMC9270422; doi:10.1038/s41598-022-15618-4), 2022-07-08
Supplement: 41598_2022_15618_MOESM1_ESM.pdf [file 41598_2022_15618_MOESM1_ESM.pdf]

**Supplementary Document for**

**A Comparison of Explainable Artificial Intelligence Methods in the Phase Classification of Multi-Principal Element Alloys**

Kyungtae Lee,<sup>1</sup> Mukil V. Ayyasamy,<sup>1</sup> Yangfeng Ji,<sup>2</sup> and Prasanna V. Balachandran<sup>1,3, a)</sup>

<sup>1)</sup>*Department of Materials Science and Engineering, University of Virginia, Charlottesville, VA 22904, USA*

<sup>2)</sup>*Department of Computer Science, University of Virginia, Charlottesville, VA 22904, USA*

<sup>3)</sup>*Department of Mechanical and Aerospace Engineering, University of Virginia, Charlottesville, VA 22904, USA*

(Dated: 16 June 2022)

**Algorithm S1.** Local interpretable ML algorithm using the BD and CP methods along with  $k$ -means clustering.

---

```

1: procedure BD_ANALYSIS(D, eSVM)                                ▷ Procedure to construct the BD dataframe with the training dataset (D)
2:   RowLength ← Size(D)                                         ▷ Total number of instances of D
3:   for i ← 1 to RowLength do                                   ▷ Loops through each instance of D
4:     for j ← 1 to 50 do                                         ▷ Loops through 50 bootstrap samples
5:       M ← eSVM[j]
6:       Exp ← Model_explainer(M, D[j])                          ▷ Generates a model explainer for a given bootstrap sample
7:       BDpred[j] ← Predict_parts(Exp, new_observation=D[i])    ▷ Calculates the variable attributions to the prediction of a
given instance
8:       Merged_BDpred[i] ← Binding(BDpred[j])                  ▷ Merges the resulting variable attributions on every loop iteration
9:     end for
10:    Avg_Merged_BDpred[i] ← Mean(Merged_BDpred[j])             ▷ Averages the BD values of all the bootstrap samples for a given
instance
11:    BD_dataframe ← Binding(Avg_Merged_BDpred[i])
12:  end for
13:  return BD_dataframe
14: end procedure
15: procedure  $k$ -MEANS_CLUSTERING(BD_dataframe)                    ▷ Procedure for  $k$ -means clustering based on BD values
16:    $k$  ← 10                                                       ▷  $k$ : the number of clusters
17:   Cluster_info ← kmean(BD_dataframe,  $k$ )                       ▷ Implements the  $k$ -means clustering algorithm
18:   return Cluster_info                                         ▷ Classifies each instance with a specific cluster label
19: end procedure
20: procedure CP_ANALYSIS(D, eSVM, Cluster_info)                 ▷ Procedure for CP analysis based on cluster information
21:   idx ← cluster_label                                         ▷ Choose a cluster label of interest
22:   for i ← 1 to length(Cluster_info[idx]) do                 ▷ Loops through all the instances with the given cluster label
23:     for j ← 1 to 50 do                                       ▷ Loops through 50 bootstrap samples
24:       M ← eSVM[j]
25:       Exp ← Model_explainer(M, D[j])
26:       CP_pred[j] ← Predict_profile(Exp, new_observation=D[i]) ▷ Calculates individual CP profiles
27:       Merged_CPpred ← Binding(CP_pred[j])                    ▷ Merges the resulting CP data on every iteration of the inner loop
28:     end for
29:     Merged_CPdata ← Binding(Merged_CPpred)                   ▷ Merges the resulting CP data on every iteration of the outer loop
30:   end for
31:   CP_dataframe ← Mean(Merged_CPdata)                          ▷ Averages the CP data across all the instances with the given cluster label
32:   return CP_dataframe
33: end procedure

```

---

(a)

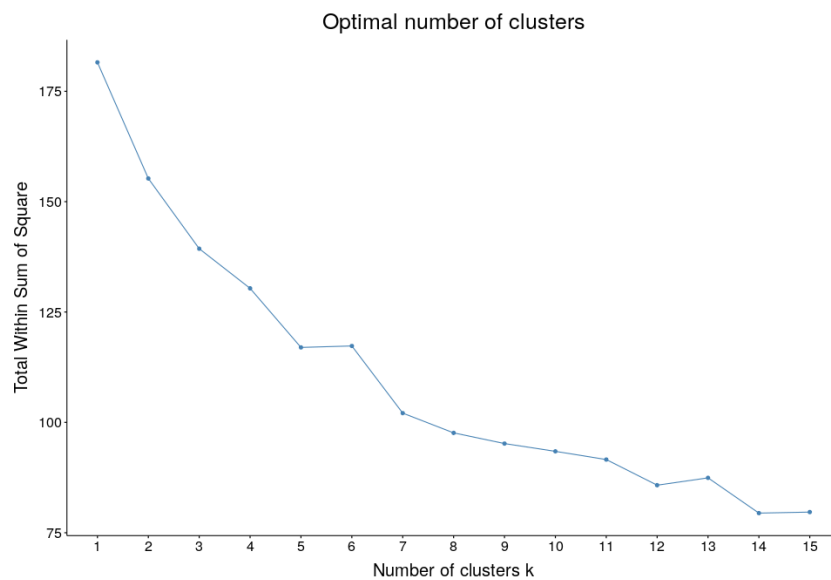

(b)

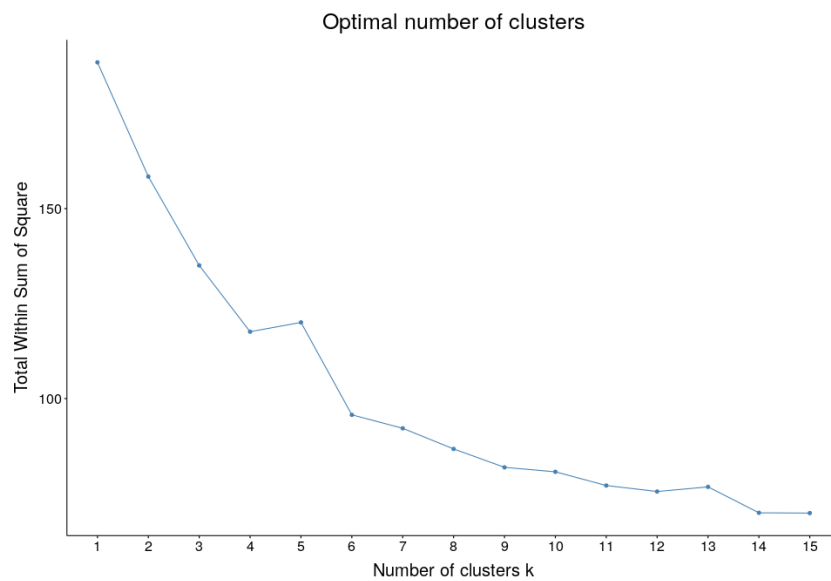

FIG. S1. The total within sum of square is plotted versus the number of cluster by the k-means clustering for the (a) BD and (b) SHAP data.

(a)

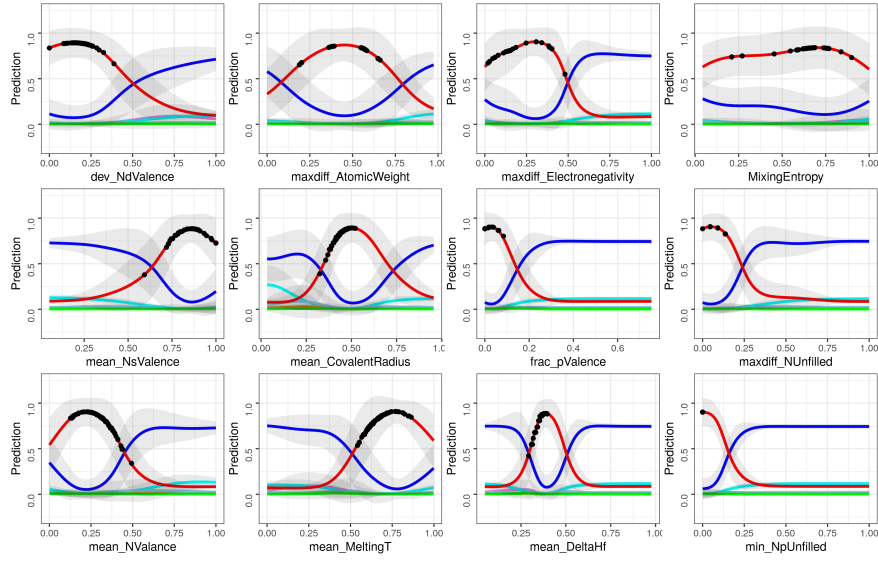

(b)

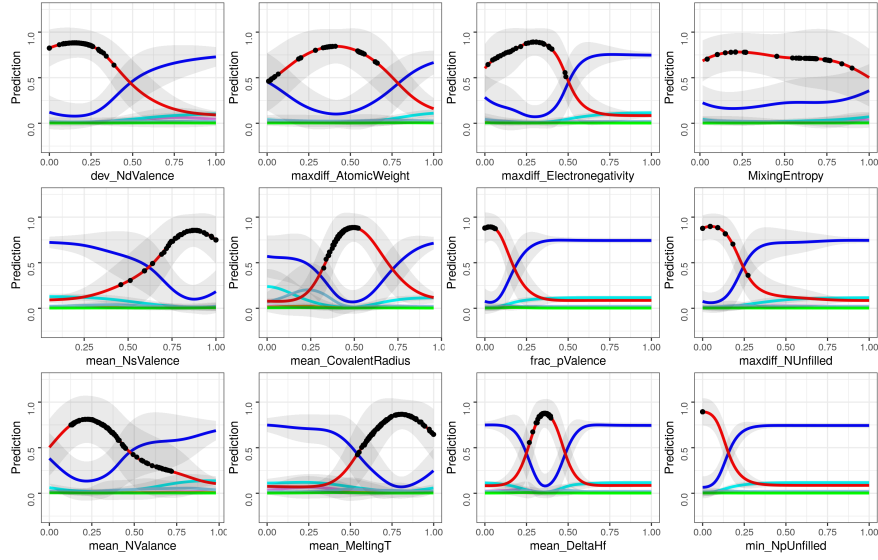

FIG. S2. The averaged CP profiles of the clusters to represent BCC phase with respect to the 12 input variables based on the (a) BD (cluster 8) and (b) SHAP data (cluster 3). The black dots indicate the true feature values for all the data points within that cluster. Line colors denote phase information: blue, MP; violet, AM; cyan, FCC; orange, BCC+FCC; lightblue, HCP; red, BCC; green, IM.

(a)

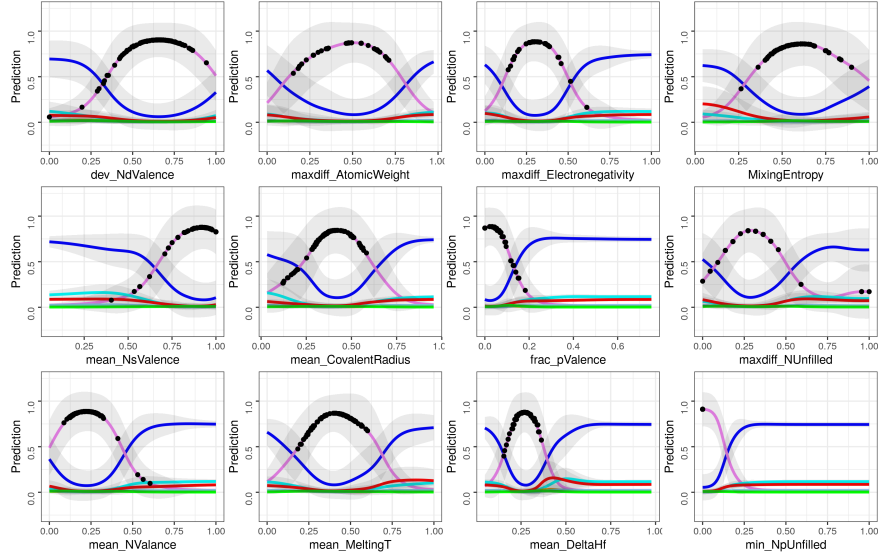

(b)

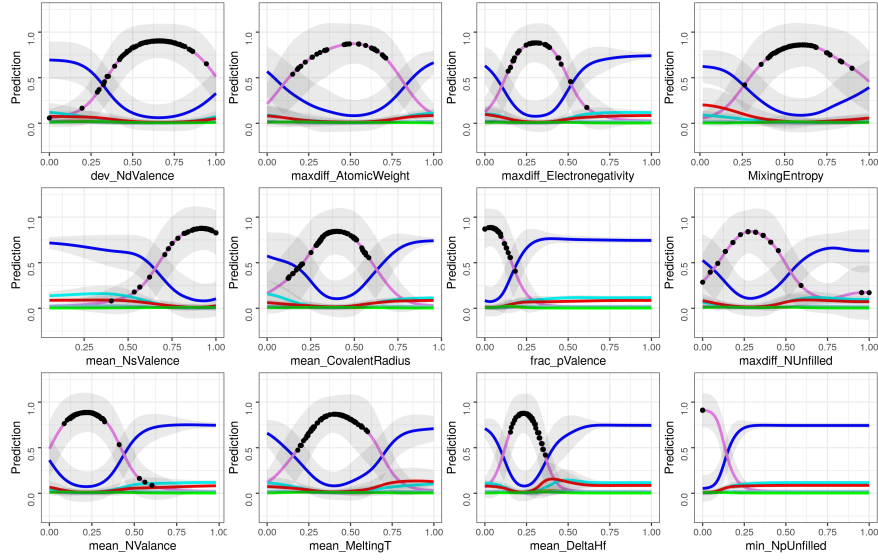

FIG. S3. The averaged CP profiles of the clusters to represent AM phase with respect to the 12 input variables based on the (a) BD (cluster 9) and (b) SHAP data (cluster 2). The black dots indicate the true feature values for all the data points within that cluster. Line colors denote phase information: blue, MP; violet, AM; cyan, FCC; orange, BCC+FCC; lightblue, HCP; red, BCC; green, IM.

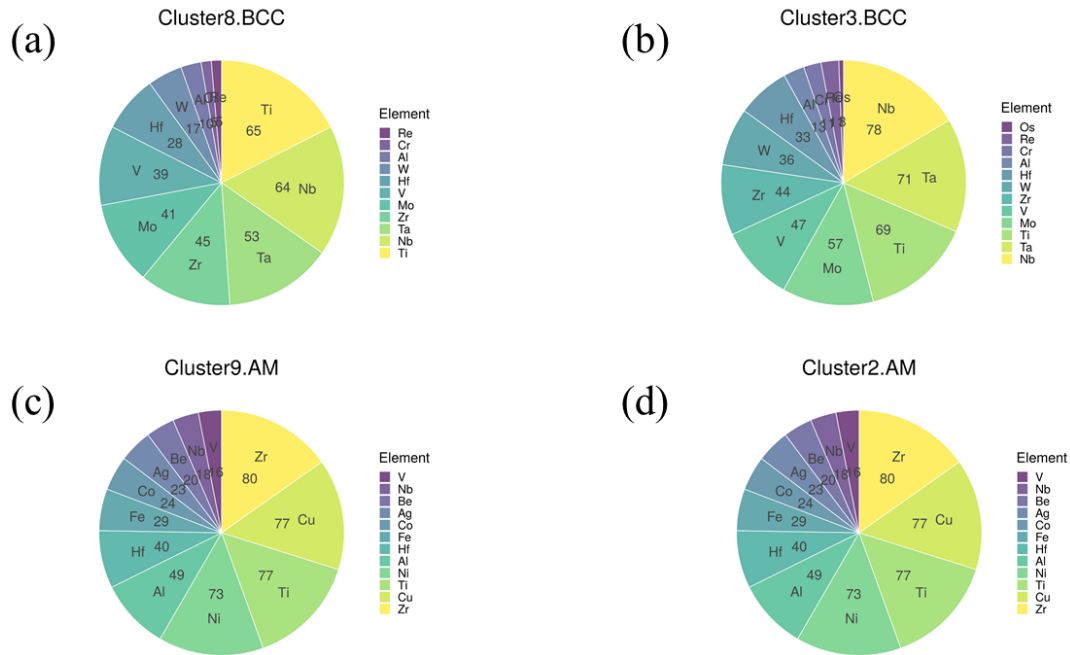

FIG. S4. Pie chart showing the distribution of elements in the BCC and AM clusters based on BD (a, c) and SHAP (b, d) decomposition.

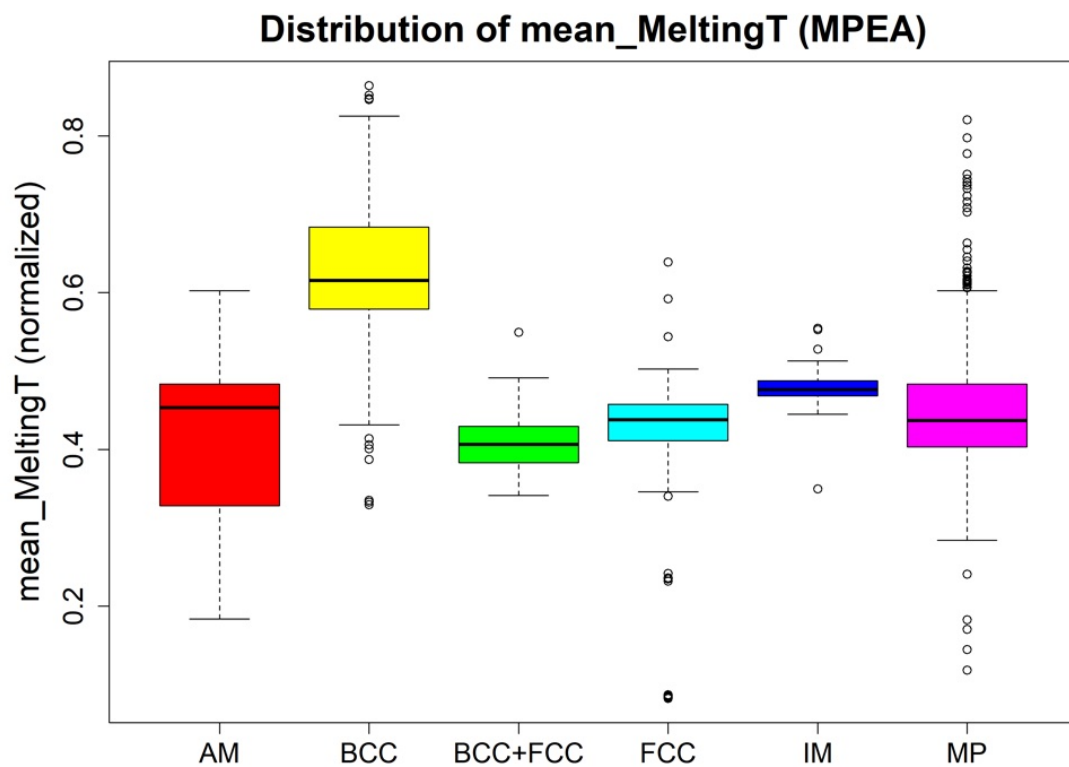

FIG. S5. Distributions of normalized mean\_MeltingT input variable with respect to each phase in the dataset where the alloy compositions with more than four elements are only considered.

(a)

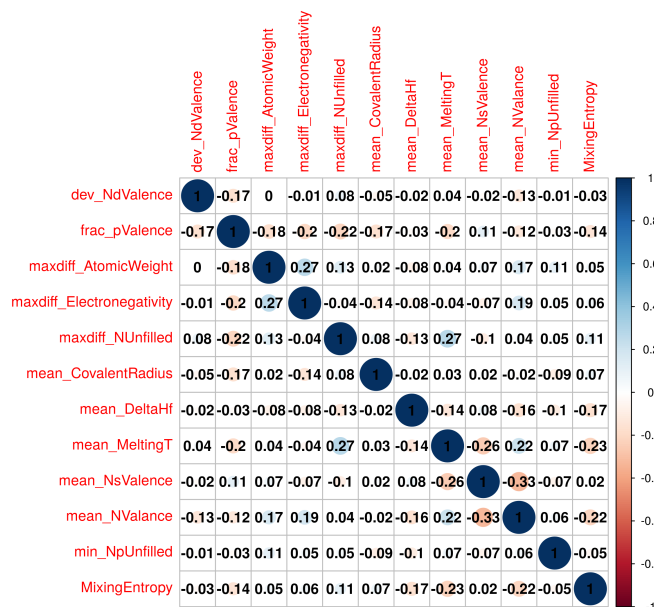

(b)

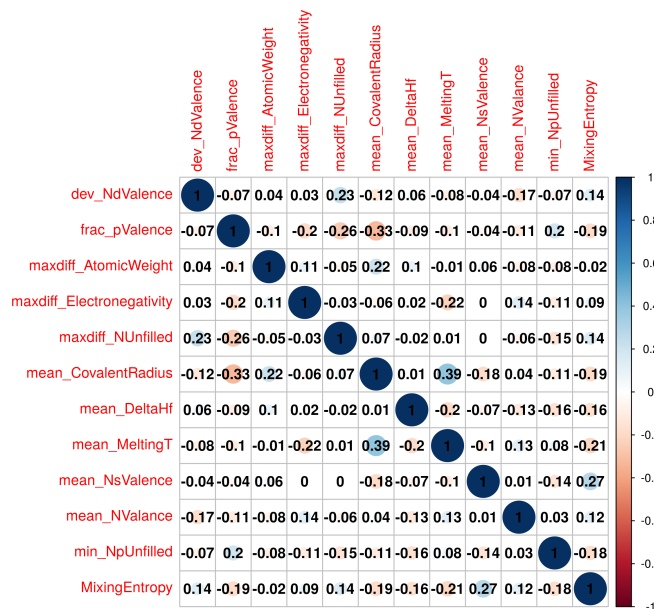

FIG. S6. Pearson correlation matrix heat maps of 12 features that are present in the (a) BD and (b) SHAP data sets, respectively. The size and color of circles describe the pair-wise correlation levels, ranging from -1 (indicating strong inverse or negative correlation) to 1 (indicating strong direct or positive correlation).



TABLE S1. ML predictive performance on the test dataset using eSVM models with 12 and 20 descriptors, denoted as eSVM12 and eSVM20, respectively. Three numbers for each phase indicate the recall, precision, and F1 score of ML prediction, respectively.

|                             | eSVM12           | eSVM20           |
|-----------------------------|------------------|------------------|
| oob error rate              | 20.1 %           | 19.1 %           |
| Overall prediction accuracy | 85.7 %           | 87.0 %           |
| AM                          | 0.88, 1.00, 0.94 | 0.98, 1.00, 0.99 |
| BCC                         | 0.85, 0.85, 0.85 | 0.85, 0.81, 0.83 |
| BCC+FCC                     | 0.53, 0.57, 0.55 | 0.47, 0.78, 0.58 |
| FCC                         | 0.81, 0.89, 0.85 | 0.83, 0.88, 0.86 |
| HCP                         | 0.77, 0.85, 0.81 | 0.87, 0.84, 0.85 |
| IM                          | 1.00, 1.00, 1.00 | 1.00, 1.00, 1.00 |
| MP                          | 0.91, 0.84, 0.87 | 0.90, 0.87, 0.88 |

TABLE S2. The cluster indices are summarized with the corresponding true and BD or SHAP-predicted phases. The phase predictions are carried out by the BD or SHAP methods, followed by the  $k$ -means clustering analysis. The true and predicted phases represent the most dominant true and BD or SHAP-predicted phase labels for a given cluster, respectively. The consistency between the true and predicted phases is quantified in the ratio columns where the number of the data points corresponding to a BD or SHAP-predicted phase is divided by the total number of data points for each cluster.

| BD prediction                 |           |         |           | SHAP prediction               |           |         |           |
|-------------------------------|-----------|---------|-----------|-------------------------------|-----------|---------|-----------|
| Cluster index<br>(True phase) | Predicted | Ratio   | Ratio (%) | Cluster index<br>(True phase) | Predicted | Ratio   | Ratio (%) |
| 4 (IM)                        | IM        | 15/15   | 100.0     | 5 (MP)                        | MP        | 106/106 | 100.00    |
| 5 (HCP)                       | HCP       | 54/54   | 100.0     | 6 (MP)                        | MP        | 206/207 | 99.52     |
| 8 (BCC)                       | BCC       | 81/82   | 98.8      | 3 (BCC)                       | BCC       | 126/127 | 99.21     |
| 1 (BCC)                       | BCC       | 124/126 | 98.4      | 4 (FCC)                       | FCC       | 103/104 | 99.04     |
| 9 (AM)                        | AM        | 123/126 | 97.6      | 9 (HCP)                       | HCP       | 87/88   | 98.86     |
| 10 (MP)                       | MP        | 333/343 | 97.1      | 7 (BCC)                       | BCC       | 102/107 | 95.33     |
| 3 (FCC)                       | FCC       | 151/161 | 93.8      | 10 (FCC)                      | FCC       | 124/133 | 93.23     |
| 2 (MP)                        | MP        | 145/176 | 82.4      | 8 (MP)                        | MP        | 161/176 | 91.48     |
| 6 (MP)                        | MP        | 129/158 | 81.7      | 2 (AM)                        | AM        | 123/144 | 85.42     |
| 7 (FCC)                       | FCC       | 57/126  | 45.2      | 1 (MP)                        | MP        | 135/175 | 77.14     |
| 7 (HCP)                       | HCP       | 38/126  | 30.2      | 2 (IM)                        | IM        | 20/144  | 13.89     |
| 7 (BCC)                       | BCC       | 26/126  | 20.7      | 1 (BCC+FCC)                   | BCC+FCC   | 23/175  | 13.14     |
| 6 (BCC+FCC)                   | MP        | 13/158  | 8.2       | 8 (BCC+FCC)                   | BCC+FCC   | 9/176   | 5.11      |
| 2 (BCC+FCC)                   | MP        | 13/176  | 7.4       | 1 (FCC)                       | MP        | 7/175   | 4.00      |
| 2 (FCC)                       | FCC       | 11/176  | 6.3       | 10 (BCC+FCC)                  | BCC+FCC   | 5/133   | 3.76      |

TABLE S3. Pair-wise correlation coefficient calculated by Pearson, Kendall, and Spearman methods between BD and SHAP data sets with respect to each input feature.

| Descriptors               | Pearson | Kendall | Spearman |
|---------------------------|---------|---------|----------|
| dev_NdValence             | 0.50    | 0.33    | 0.50     |
| frac_pValence             | 0.77    | 0.63    | 0.80     |
| maxdiff_AtomicWeight      | 0.55    | 0.38    | 0.55     |
| maxdiff_Electronegativity | 0.56    | 0.46    | 0.64     |
| maxdiff_NUnfilled         | 0.56    | 0.36    | 0.53     |
| mean_CovalentRadius       | 0.55    | 0.38    | 0.55     |
| mean_DeltaHf              | 0.52    | 0.37    | 0.53     |
| mean_MeltingT             | 0.62    | 0.51    | 0.71     |
| mean_NsValence            | 0.38    | 0.38    | 0.54     |
| mean_NValence             | 0.40    | 0.38    | 0.55     |
| min_NpUnfilled            | 0.78    | 0.50    | 0.74     |
| MixingEntropy             | 0.56    | 0.40    | 0.57     |
